# Supplementary material
Source: publisher figshare collection journal article supplement (https://frontiersin.figshare.com/ndownloader/files/13868861)
Supplement: Supplementary file [file 13868861]

## Supplementary Tables

**Table S1.** Kruskal-Wallis rank sum test for treatment effects

| Site          | Alpha Diversity   | chi-squared | df | p-value     |
|---------------|-------------------|-------------|----|-------------|
| Shallow Shelf | Richness          | 11.44       | 7  | 0.12        |
|               | Shannon Diversity | 14.33       | 7  | <b>0.05</b> |
|               | Pielou's evenness | 13.83       | 7  | <b>0.05</b> |
| Shallow Slope | Richness          | 5.26        | 7  | 0.63        |
|               | Shannon Diversity | 14.00       | 7  | <b>0.05</b> |
|               | Pielou's evenness | 14.45       | 7  | <b>0.04</b> |
| Deep Shelf    | Richness          | 3.71        | 7  | 0.81        |
|               | Shannon Diversity | 10.20       | 7  | 0.18        |
|               | Pielou's evenness | 12.44       | 7  | 0.09        |
| Deep Slope    | Richness          | 3.25        | 7  | 0.86        |
|               | Shannon Diversity | 3.84        | 7  | 0.80        |
|               | Pielou's evenness | 6.65        | 7  | 0.47        |

**Table S2.** Concentration of metals and NO<sub>3</sub> in the different treatments

|            | Metal concentration nmol/L | NO <sub>3</sub> concentration umol/L |
|------------|----------------------------|--------------------------------------|
| <b>Mn</b>  | 6.02                       | 0.10                                 |
| <b>Fe</b>  | 11.99                      | 0.20                                 |
| <b>Co</b>  | 0.12                       | 0.002                                |
| <b>Ni</b>  | 17.97                      | 0.30                                 |
| <b>Cu</b>  | 6.97                       | 0.13                                 |
| <b>Zn</b>  | 19.99                      | 0.39                                 |
| <b>Mix</b> | all together               | 1.12                                 |

## Supplementary Figure legends

**Figure S1.** OTU Richness of heterotrophic prokaryotes in response to Co, Cu, Fe, Mn, Ni, Zn and the combination of all (Mix), and in unamended controls (Ctrl), experiments performed with water collected from (A) surface-coastal, (B) deep-coastal (C) surface-open ocean, and (D) deep-open ocean.

**Figure S2.** Shannon diversity index of heterotrophic prokaryotes in response to Co, Cu, Fe, Mn, Ni, Zn and the combination of all (Mix), and in unamended controls (Ctrl), experiments performed with water collected from (A) surface-coastal, (B) deep-coastal (C) surface-open ocean, and (D) deep-open ocean.

**Figure S3.** Relative abundance of prokaryotic 16S rRNA sequences, at the phylum level, in response to Co, Cu, Fe, Mn, Ni, Zn and the combination of all (Mix), and in unamended controls (Ctrl), experiments performed with water collected from (A) surface-coastal, (B) deep-coastal (C) surface-open ocean, and (D) deep-open ocean. Only phyla with a relative abundance  $\geq 1\%$  are included.

**Figure S4.** Relative abundance of prokaryotic 16S rRNA sequences, at the genus level, in response to Co, Cu, Fe, Mn, Ni, Zn and the combination of all (Mix), and in unamended controls (Ctrl), experiments performed with water collected from (A) surface-coastal, (B) deep-coastal (C) surface-open ocean, and (D) deep-open ocean.

**Figure S5.** Total abundance of reads of the 16S rRNA sequences of the genus *Thalassolituus*, in response to Co, Cu, Fe, Mn, Ni, Zn and the combination of all (Mix), and in unamended controls (Ctrl), experiments performed with water collected from surface-coastal, deep-coastal, surface-open ocean, and deep-open ocean.
